RESEARCH ARTICLE

# Processing of the major autolysin of *E. faecalis*, AtIA, by the zinc-metalloprotease, GeIE, impacts AtIA septal localization and cell separation

Emily K. Stinemetz<sup>1,2</sup>, Peng Gao<sup>1</sup>, Kenneth L. Pinkston<sup>1</sup>, Maria Camila Montealegre<sup>2</sup>, Barbara E. Murray<sup>2,3</sup>, Barrett R. Harvey<sup>1,2,3\*</sup>

**1** Center for Molecular Imaging, Brown Foundation Institute of Molecular Medicine for the Prevention of Human Diseases, University of Texas Health Science Center, Houston, Texas, United States of America, **2** Department of Microbiology and Molecular Genetics, University of Texas Health Science Center, Houston, Texas, United States of America, **3** Division of Infectious Disease, Department of Internal Medicine, University of Texas Health Science Center, Houston, Texas, United States of America

☞ These authors contributed equally to this work.

\* [barrett.harvey@uth.tmc.edu](mailto:barrett.harvey@uth.tmc.edu)

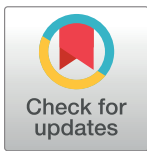

**OPEN ACCESS**

**Citation:** Stinemetz EK, Gao P, Pinkston KL, Montealegre MC, Murray BE, Harvey BR (2017) Processing of the major autolysin of *E. faecalis*, AtIA, by the zinc-metalloprotease, GeIE, impacts AtIA septal localization and cell separation. PLoS ONE 12(10): e0186706. <https://doi.org/10.1371/journal.pone.0186706>

**Editor:** Eric Cascales, Centre National de la Recherche Scientifique, Aix-Marseille Université, FRANCE

**Received:** August 1, 2017

**Accepted:** October 5, 2017

**Published:** October 19, 2017

**Copyright:** © 2017 Stinemetz et al. This is an open access article distributed under the terms of the [Creative Commons Attribution License](https://creativecommons.org/licenses/by/4.0/), which permits unrestricted use, distribution, and reproduction in any medium, provided the original author and source are credited.

**Data Availability Statement:** All relevant data is within the paper.

**Funding:** Support for this work was provided in part by the Dunn Foundation to BRH and NIH grant R01 AI047923-14 from NIAID to BEM. The funder had no role in study design, data collection and analysis, decision to publish, or preparation of the manuscript.

## Abstract

AtIA is the major peptidoglycan hydrolase of *Enterococcus faecalis* involved in cell division and cellular autolysis. The secreted zinc metalloprotease, gelatinase (GeIE), has been identified as an important regulator of cellular function through post-translational modification of protein substrates. AtIA is a known target of GeIE, and their interplay has been proposed to regulate AtIA function. To study the protease-mediated post-translational modification of AtIA, monoclonal antibodies were developed as research tools. Flow cytometry and Western blot analysis suggests that in the presence of GeIE, surface-bound AtIA exists primarily as a N-terminally truncated form whereas in the absence of GeIE, the N-terminal domain of AtIA is retained. We identified the primary GeIE cleavage site occurring near the transition between the T/E rich Domain I and catalytic region, Domain II via N-terminal sequencing. Truncation of AtIA had no effect on the peptidoglycan hydrolysis activity of AtIA. However, we observed that N-terminal cleavage was required for efficient AtIA-mediated cell division while unprocessed AtIA was unable to resolve dividing cells into individual units. Furthermore, we observed that the processed AtIA has the propensity to localize to the cell septum on wild-type cells whereas unprocessed AtIA in the  $\Delta$ geIE strain were dispersed over the cell surface. Combined, these results suggest that AtIA septum localization and subsequent cell separation can be modulated by a single GeIE-mediated N-terminal cleavage event, providing new insights into the post-translation modification of AtIA and the mechanisms governing chaining and cell separation.

**Competing interests:** The authors have declared that no competing interests exist.

## Introduction

*Enterococcus faecalis*, a Gram-positive commensal bacterium of the gastrointestinal tract, is an important pathogen in hospital-acquired infections (HAIs) [1,2]. *E. faecalis* is capable of establishing surface communities known as biofilms on both human tissue and medical devices [3–5]. Due to increasing numbers of antibiotic resistant isolates and difficulty in eradicating biofilms, enterococcal infections have become a significant challenge in healthcare [6,7]. Thus, there is increased urgency to improve our understanding of the underlying factors that contribute to *E. faecalis* virulence in order to pursue alternative approaches in medical treatments.

AtlA, an autolysin involved in peptidoglycan hydrolysis [8], plays an important role in the separation of daughter cells following replication. In *E. faecalis*, an *atlA* deletion mutant presents a long chaining phenotype under light microscopy [8], with strings of cells attached end to end due to incomplete septum cleavage. The impact of AtlA on septal cleavage is further demonstrated by the addition of AtlA protein to an *atlA* deletion mutant, resulting in short chaining cells [9]. Evidence suggests that conditions promoting chain formation may promote virulence in Gram-positive bacteria by encouraging adherence and colonization in the host, given that longer forms would have more adhesins available per particle and exhibit improved avidity due to increased protein-ligand interactions [10,11]. In addition, evidence suggests that AtlA is a major contributor to biofilm formation through its autolytic activity as an *atlA* deletion strain demonstrated minimal autolysis using standard autolytic assays and are attenuated in their ability to form biofilms [8,12]. Furthermore, it was recently demonstrated that AtlA control over chain length greatly impacts the virulence of *E. faecalis* in a zebrafish model of infection. [13].

An extracellular zinc metalloprotease known as gelatinase (GelE), which is regulated by the Fsr-quorum sensing system of *E. faecalis*, has been identified as a major virulence factor in the establishment of infection through bacterial adherence and biofilm formation [12,14–18]. GelEs contribution to virulence is partially attributed to the role it plays in the regulation of AtlA. A mechanism has been previously proposed by which proteolytic processing of AtlA mediates lysis of bacterial cells, which in turn releases extracellular DNA (eDNA), thus stabilizing biofilm [19,20]. Consistent with evidence demonstrating a role for GelE in the regulation of AtlA activity,  $\Delta$ *gelE* mutants exhibit attenuated autolytic ability and also demonstrate a chaining phenotype as observed by microscopy, albeit less pronounced than *atlA* mutants [21].

Through sequence comparison to other autolysins, it was determined that AtlA is composed of three domains [22]. Domain I has been defined as a T/E rich domain with no known function; Domain II contains the enzymatic activity region responsible for peptidoglycan hydrolysis; while Domain III contains six LysM residues necessary for anchoring AtlA to the cell wall through recognition of N-acetylglucosamine (GlcNAc) residues of peptidoglycan [23]. Eckert *et al.* demonstrated that, while the C-terminal region was necessary for enzymatic activity, this was likely a consequence of orienting Domain II more proximal to its peptidoglycan cell wall substrate [22].

In this study, monoclonal antibodies were developed which recognize different domains of AtlA as tools to improve our understanding of the impact protease-mediated post-translational modification of AtlA has on cellular function. Using N-terminal sequencing, a GelE cleavage site on AtlA was identified which removed the T/E rich N-terminus of the protein. Our analysis demonstrated that loss of the N-terminus did not affect the ability of AtlA to hydrolyze peptidoglycan, but rather directly affected the localization of surface associated AtlA to the cell septum, and its ability to separate daughter cells. Furthermore, we discuss the potential implications that post-translation modification of AtlA could have on *E. faecalis* virulence by regulating colonization and dispersion of infection.

## Materials and methods

### Chemicals

Unless otherwise indicated, all culture media were purchased from Difco Laboratories and all chemicals were purchased from Sigma (St. Louis, MO). Brain heart infusion (BHI) and Luria broth (LB) were prepared as described by the manufacturer (Becton, Dickinson). Bacto agar was used as a solidifying agent for all semi-solid media. Oligonucleotides were purchased from Sigma (St. Louis, MO).

### Bacterial strains and culture conditions

All *Enterococcus* strains were grown in BHI broth or on BHI agar plates at 37°C. *E. coli* strains used for protein purification were grown in LB at 37°C. The *E. faecalis* strains used included OG1RF [24], TX5264 (OG1RF  $\Delta$ gelE) [25], JH2-2 [26], TX5127 (OG1RF  $\Delta$ atIA) [8], TX5243 (OG1RF *sprE* insertion mutant [ $\nabla$ *sprE*]) [17], TX5471 (OG1RF  $\Delta$ gelE $\Delta$ *sprE*) [27], and OG1RF  $\Delta$ atIA $\Delta$ gelE (developed in this study). If required, growth medium was supplemented with antibiotics at the following concentration: 100  $\mu$ g/mL ampicillin, 200  $\mu$ g/mL gentamicin, 100  $\mu$ g/mL rifampicin, 25  $\mu$ g/mL fusidic acid, and 2000  $\mu$ g/mL kanamycin.

### Construction of the *atIA* and *gelE* deletion mutant

Deletions were generated as previously described [28]. The primer pairs AtIAUpFor (5' – CGGGATCCTGACTGATTTTTCCGCTTG – 3')/ AtIAUpRev (5' – CATTGCCACGTGACATTGATTCTTTCTTC – 3') and AtIADownFor (5' – CAATGTACAGTGGCAATGCTTCTTCAAC – 3')/ AtIADownRev (5' – CGGAATTCGCTCCTTCAGAACGTCCA – 3') were used to amplify the sequences upstream and downstream of the *atIA* gene. The forward primer of the upstream region was designed to incorporate a BamHI site, and the reverse primer of the downstream region was designed to incorporate an EcoRI site. These two amplicons were joined by PCR overlap extension [29], resulting in a 5' BamHI site and a 3' EcoRI site which were used for insertion in the recipient pHOU1 vector [30]. The resulting plasmid was then introduced into *E. faecalis* CK111 by electroporation and then filter mated with *E. faecalis*  $\Delta$ gelE (TX5264). The  $\Delta$ atIA $\Delta$ gelE double deletion mutant was selected by culturing the colonies on minimal medium 9-yeast extract-glucose (MM9YEG) plates supplemented with 10 mM p-chloro-phenylalanine, and verified using two sets of primers outside the deleted region and pulsed field gel electrophoresis (PFGE) was used to verify the correct background.

### Recombinant protein construction, expression, and purification

Expression and purification of rAtIA was carried out as previously described [22,31]. All recombinant proteins were constructed and purified in a similar manner using different primers for amplification. A DNA fragment encoding AtIA was amplified from OG1RF by PCR with the primers AtIABamHIFor (5' – GCAGGATCCACAGAAGAGCAGCCAACAAATGC – 3') and AtIAKpnIRev (5' – CTCCGGTACCTCATTAACCAACTTTTAAAGTTTGACC – 3') and ligated into pQE30 (Qiagen, Inc.) using BamHI and KpnI sites. The resulting plasmid was transformed into M15 *E. coli* harboring pREP4 (Qiagen, Inc.). Recombinant AtIA (rAtIA) begins with the amino acids TEEQPT and ends with the amino acids QTLKVG. A DNA fragment encoding AtIA D2D3 (Domain 2-Domain 3 truncated AtIA) was amplified from OG1RF by PCR with the primers AtIAD2BamHIFor (5' – GCAGGATCCGAATTTATTGCCGAGTTAGCTCG – 3') and AtIAKpnIRev (above). Recombinant D2D3 (rD2D3) begins with the amino acids SEFIAE and ends with the amino acids QTLKVG. A DNA fragment encoding AtIA D3 (Domain 3 truncated AtIA) was amplified from OG1RF by PCR with the primers

AtIAD3BamHIFor (5' – GCAGGATCCCCATCTTCTGGT – 3') and AtIAKpnIRev (above). Recombinant D3 (rD3) begins with amino acids TPSSGGNT and ends with the amino acids QTLKVG. A DNA fragment encoding AtIA' (N-terminally truncated at identified GelE cleavage site) was amplified from OG1RF by PCR with the primers AtIA'BamHIFor (5' – GCAGGATCCTTATCACCGACGCAAAGTCC – 3') and AtIAKpnIRev (above). Recombinant AtIA' (rAtIA') begins with the amino acids LSPTQ and ends with the amino acids QTLKVG.

## Development of anti-AtIA mAbs

Monoclonal antibody (mAb) generation against recombinant AtIA (rAtIA) was carried out as previously described [27,32]. Briefly, 6–8 week old BALB/c (Harlan) mice were immunized in three subcutaneous sites with 10–20µg rAtIA protein emulsified into Freund's Complete Adjuvant (CFA, SIGMA) followed by 2 subsequent immunizations via intraperitoneal injection with protein emulsified into Freund's Incomplete Adjuvant (IFA, SIGMA) at 10–14 day intervals. Following the third immunization, serum titers were determined via ELISA against rAtIA. One mouse was selected for final intraperitoneal boost in Phosphate Buffered Saline (PBS). Mouse splenocytes were collected 3 days post injection and fused with SP2/0 mouse myeloma cells [33]. MAbs from parental wells were evaluated for binding specificity to rAtIA and native surface displayed antigen on OG1RF cells via ELISA and whole-cell ELISA [34,35], followed by kinetic screening for the highest affinity clones using surface plasmon resonance (SPR) on a Biacore T100 (GE Healthcare) as previously described [36].

## Specificity ELISA

Specificity ELISA was carried out as previously described [32] with slight modifications. Briefly, Microtiter 600 ELISA microtiter plates (Greiner Bio-one, NC) were coated with 10 µg/mL of recombinant proteins (rAtIA, rD2D3, and rD3) in 50 mM carbonate buffer at 4°C overnight. Plates were washed 3 times with PBS-0.2% Tween 20 (PBST) and then incubated with 5% dry milk in PBST to block nonspecific binding. Anti-AtIA mAbs at 10 µg/ml were used for primary binding for 1 hr at RT followed by a wash and the addition of 100 µl of a 1:3,000 dilution of goat anti-mouse IgG-HRP in 5% milk-PBST (Jackson ImmunoResearch). After 1 h of incubation at RT, the wells were washed three times with PBS-0.2% Tween 20. Tetramethylbenzidine (TMB) substrate was added, followed by incubation at room temperature for 10 min, before stopping the reaction with the addition of 2M H<sub>2</sub>SO<sub>4</sub>. The absorbance of each well was measured at an optical density at 450 nm (OD<sub>450</sub>).

## Flow cytometry analysis

Flow cytometry analysis was performed as previously described [32]. *E. faecalis* cells in BHI and appropriate antibiotics were harvested at an OD<sub>600</sub> equivalent of 0.4, washed twice with 2% BSA-PBS and labeled for 0.5 hour at 25°C with 10 µg/mL of either anti-AtIA mAb 44 or 88 in 2% BSA-PBS. After two washes, the cells were labeled with 1:100 R-phycoerythrin (PE) conjugated goat F(ab')<sub>2</sub> anti-mouse IgG (Fc) (Jackson ImmunoResearch) in 2% BSA-PBS for 0.5 hour at 25°C in the dark. The cells were then washed, followed by fixation with 1 ml of 1% paraformaldehyde for analysis on a Becton Dickinson FACSCalibur flow cytometer (BD Bioscience, CA). For each sample, 10,000 gated events were collected for analysis.

## Western blotting

*E. faecalis* cells were harvested after 4 hours of growth at 37°C. Cell pellets were resuspended in SDS-PAGE sample buffer, and heated for 10 minutes at 95°C. The samples were loaded on a

10% Tris-glycine gel under reducing conditions in MOPS (morpholinepropanesulfonic acid buffer) and transferred to an Immobilon-P polyvinylidene difluoride (PVDF) membrane (Millipore) according to manufacturer's protocol. Membranes were probed with anti-AtIA mAbs 44 or 88 at 10  $\mu$ /mL followed by HRP-conjugated goat anti-mouse IgG secondary antibody and developed using the TMB substrate system (KPL).

### Peptidoglycan hydrolase activity assay

To purify peptidoglycan free of AtIA [22,37], OG1RF  $\Delta$ atIA cells were grown to an OD<sub>650</sub> of 0.7. The bacteria were centrifuged and peptidoglycan was extracted by treating the pellet with 14 mL 4% sodium dodecyl sulfate (SDS) for 30 minutes at 100°C. Peptidoglycan was washed five times with 20 mL of water and was then incubated with Pronase (200  $\mu$ g/mL) in 1 mL of Tris-HCl (10 mM) and with trypsin (200  $\mu$ g/mL) in 1 mL of phosphate buffer overnight at 37°C. Peptidoglycan was washed two times with 20 mL of water. To digest peptidoglycan with recombinant protein, 10  $\mu$ g/mL of either recombinant AtIA or AtIA' was added to purified peptidoglycan. Turbidity at 450 nm was measured every 30 minutes on a Genesys 20 Spectrophotometer (Thermo Fisher) over a 6-hour time period at 37°C in 25 mM Tris-HCl pH 7.5, 100 mM NaCl.

### N-terminal sequencing

For rAtIA cleavage, reaction mixtures containing 10  $\mu$ g of rAtIA and 10  $\mu$ g/mL purified GelE in 0.1 mL PBS were incubated for 30 minutes at 37°C. The enzyme activity was stopped by the addition of SDS-PAGE sample buffer containing 2-mercaptoethanol followed by boiling. Samples were applied onto SDS-PAGE gradient gels (4 to 20%) (NuSep, Inc.), followed by a transfer to an Immobilon-P polyvinylidene difluoride (PVDF) membrane (Millipore) according to manufacturer's protocol. The band representing cleaved AtIA was cut from the PVDF membrane and the Protein Chemistry Laboratory at Texas A&M University (College Station, TX) was contracted to complete the N-terminal sequencing.

### Gelatinase-AtIA cleavage assay

Cleavage assays used purified GelE. Purified GelE was obtained from  $\nabla$ sprE as described previously [27,38,39]. Briefly, cells were grown to stationary phase and the culture medium was filtered with 0.45 and 0.22  $\mu$ m pore-size filters. Proteins were precipitated overnight at 4°C with the addition of ammonium sulfate crystals to a saturation of 60%. After centrifugation, the protein pellet was dialyzed overnight 4°C in 50 mM Tris-HCl-1 mM CaCl<sub>2</sub>, pH 7.8. A second concentration step was carried out using a Millipore stirred-cell concentrator with a 10,000-molecular weight cutoff membrane. Sample was then applied to a HiPrep 16/60 Sephacryl S-200 high-resolution column (GE Healthcare) and tested for gelatinase activity via gelatin agar plates [40].

For rAtIA cleavage, reaction mixtures containing 3  $\mu$ g of rAtIA and various amounts of purified GelE (ranging from 0 to 1.5  $\mu$ g) in 0.1 ml of PBS were incubated for 30 minutes at 37°C. The enzyme activity was halted by the addition of SDS-PAGE sample buffer containing 2-mercaptoethanol followed by boiling. Purified GelE (1.5  $\mu$ g) and rAtIA (3.0  $\mu$ g) were diluted in 0.1 ml of PBS and incubated similarly to serve as controls. Samples were applied onto SDS-PAGE gradient gels (4 to 20%) (NuSep, Inc.), and developed with Coomassie blue protein stain (Sigma).

### Light microscopy

Chaining phenotype was determined as previously described with slight modifications [41]. *Enterococcus* cells were grown overnight in BHI medium with 100  $\mu$ g/mL rifampicin and

25 µg/mL fusidic acid. The following morning the cells were diluted to an OD<sub>600</sub> of 0.1 and were grown at 37°C for 3.5 hours while shaking at 240 RPM. 5µg/mL recombinant full-length AtIA or cleaved AtIA (AtIA') was then added to either the  $\Delta atIA$  or  $\Delta atIA\Delta gelE$  strains and allowed to incubate at 37°C while shaking for 0.5 hour. As controls, OG1RF,  $\Delta atIA$  and  $\Delta atIA\Delta gelE$  strains were incubated in parallel without the addition of recombinant proteins. Cells were then harvested and resuspended in 8 mL 0.9% saline. Finally, 10 µL was spotted on a glass slide, covered with a coverslip and visualized under a light microscope at 1000x magnification. The numbers of cells per chain were recorded for 50 randomly chosen chains of each strain and classified for length based on criteria defined in previous work [41].

## Immunogold electron microscopy

Transmission electron microscopy (TEM) experiments were carried out as previously described [42]. Briefly, *E. faecalis* cells grown overnight in BHI medium were centrifuged and washed once with 0.1 M NaCl and twice with PBS. Next, 10 µL of bacterial suspension in PBS was incubated on a nickel-coated carbon grid for 1 minute and the samples were washed three times with 1% BSA in PBS. Samples were blocked for an hour at 25°C with 0.1% gelatin in PBS. Following a 1% BSA-PBS wash, the samples were labeled with  $\alpha$ -AtIA mAb 44 (10 µg/mL in 1% BSA-PBS) for 1 hour at 25°C. The samples were then washed with 1% BSA-PBS three times and blocked with 0.1% Gelatin in PBS for 1 hour at 25°C. Following the second blocking step, the samples were labeled with 1:20 diluted 18 nm affiniPure gold-conjugated anti-mouse IgG (Jackson ImmunoResearch, Lot #131575) in 1% BSA-PBS for 1 hour at 25°C. Subsequently, the samples were stained with 0.1% uranyl acetate in H<sub>2</sub>O for 30 seconds and imaged on a JEOL JEM-1400 electron microscope.

Quantification analysis of AtIA localization was done using TEM images as previously described [43]. Forty representative bacteria cells at the late phase of separation with clear septa were analyzed from each OG1RF and  $\Delta gelE$  strain. Each bacterium was divided into 3 equal regions from the center septum to pole. Numbers of gold particles in each region were counted and comparison was made between the two strains.

## Results

### Anti-AtIA mAbs display distinct AtIA binding profiles

It was previously discovered that GelE cleaves AtIA. However, GelE cleavage sites in AtIA were not reported [20]. To further investigate the protease-mediated cleavage of AtIA, we developed in house two high affinity mouse anti-AtIA monoclonal antibodies (mAb44 and mAb 88) and analyzed their binding profiles to various AtIA domain constructs using ELISA. As shown in Fig 1A, mAb 44 and 88 demonstrate different binding profiles against recombinant full-length AtIA (rAtIA), AtIA Domain II, III (D2D3), and AtIA Domain III (D3), suggesting that anti-AtIA mAb 88 recognizes only full-length rAtIA, mAb 44 recognizes both the full-length rAtIA and rD2D3, while neither mAb recognized rD3 AtIA. A recombinant version of the *E. faecalis* surface protein, Ace, and an Ace specific antibody mAb 70 were used as irrelevant protein and irrelevant mAb controls, respectively. These results indicate that mAb 44 and 88 bind to distinct binding epitopes on AtIA and might be used to distinguish AtIA cleavage events.

Using the domain-specific antibodies 44 and 88, we carried out Western blot analysis to evaluate AtIA extracted from wild-type OG1RF versus  $\Delta gelE$  grown to stationary phase. Additionally, we included strains incapable of producing SprE, ( $\nabla sprE$ , and  $\Delta gelE\Delta sprE$ ) a serine protease co-transcribed with GelE, which has previously been reported to process AtIA [20]. When mAb 88 was used as the primary antibody, a single band comparable in size to that of recombinant full length AtIA (molecular weight 71.4 kDa) was detected in  $gelE$  deletion strains

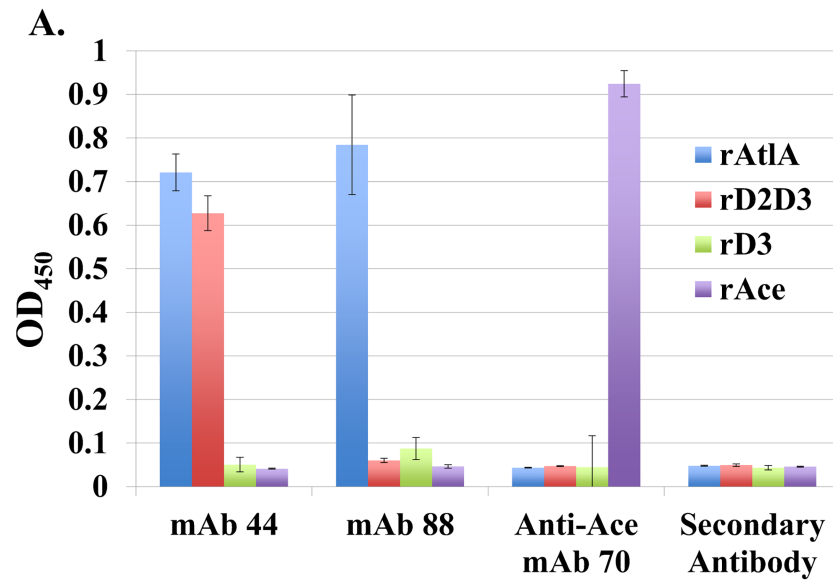

**B. mAb 44**

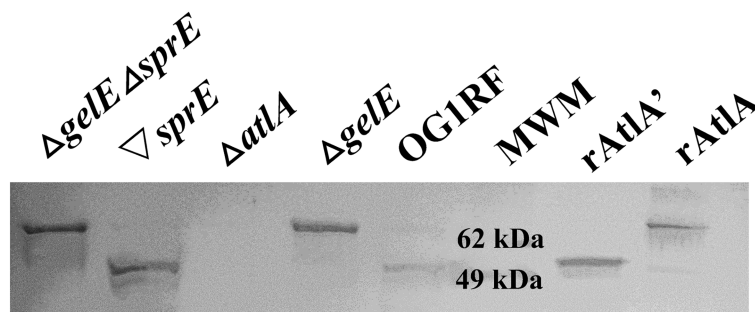

**C. mAb 88**

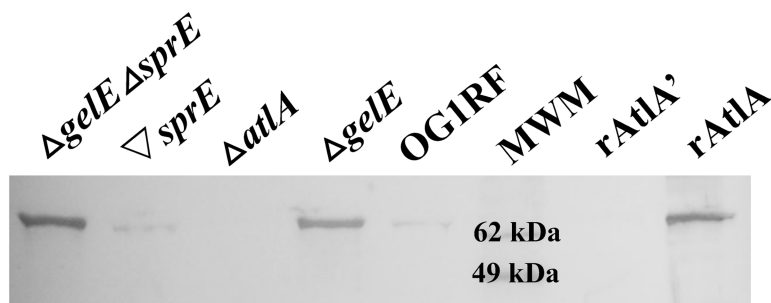

**Fig 1. Anti-AtIA mAbs 44 and 88 distinguish GelE-truncated AtIA from full-length AtIA.** (A) Anti-AtIA mAb 44 and 88 were evaluated via ELISA for their ability to bind to recombinant full-length AtIA, D2D3, and D3. Anti-Ace mAb 70 and secondary antibody alone were run as controls. Results shown are averages of three independent experiments and error bars represent 1 standard deviation of the mean. (B and C) Supernatants collected from whole cell lysates of OG1RF,  $\Delta gelE$ ,  $\Delta atIA$ ,  $\Delta sprE$ , and  $\Delta sprE \Delta gelE$  strains were probed in Western blots with either anti-AtIA mAb 44 (B) or mAb 88 (C) as the primary antibody. Results shown are representative of three independent experiments.

<https://doi.org/10.1371/journal.pone.0186706.g001>

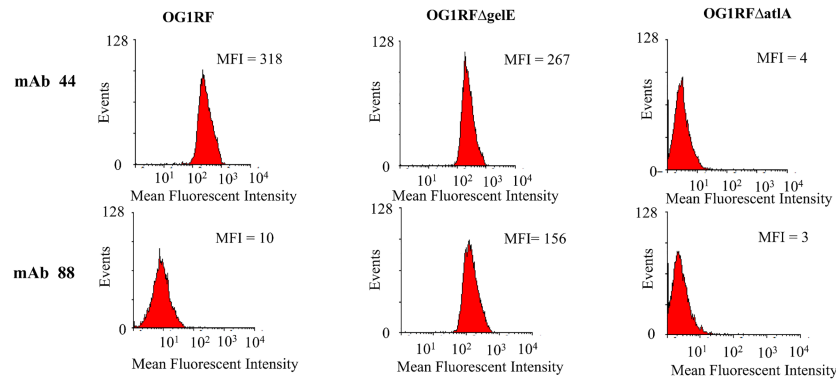

**Fig 2. A surface-associated truncated form of AtIA is present in the presence of GelE.** Flow cytometry analysis of wild-type OG1RF,  $\Delta$ gelE, and  $\Delta$ atlA strains with either anti-AtIA mAb 44 or mAb 88 demonstrate two unique binding profiles. mAb 88 recognized AtIA on the surface in the  $\Delta$ gelE strain while mAb 44 recognized AtIA in both the wild-type OG1RF and the  $\Delta$ gelE strain. The  $\Delta$ atlA strain was used as a control to demonstrate specificity of mAb binding. Results shown are representative of three independent experiments.

<https://doi.org/10.1371/journal.pone.0186706.g002>

( $\Delta$ gelE and  $\Delta$ gelE $\Delta$ sprE), but not detected in the GelE producing strains (OG1RF and  $\nabla$ sprE) (Fig 1B). When detecting with mAb 44 however, strains that produce GelE show a distinct band smaller in size than that of recombinant full length AtIA, suggesting cleavage of AtIA by GelE (Fig 1B). Together with ELISA results in Fig 1A suggesting that mAb 88 binds within the N-terminus of AtIA, we propose that AtIA cleavage occurs in *E. faecalis* in presence of GelE, and that cleavage removes an N-terminal sequence of the protein.

### Surface bound AtIA is present as a truncated form when in the presence of GelE

Consistent with the ELISA and Western blot results, two distinct binding profiles became apparent while assessing the ability of anti-AtIA mAb panel to bind to surface bound AtIA on both exponentially grown wild-type *E. faecalis* (OG1RF) and  $\Delta$ gelE cells using flow cytometry. Evaluation at exponential phase assured that Fsr mediated GelE expression would be induced in the wild-type [27]. The mAb 88 demonstrated specific binding to the  $\Delta$ gelE strain surface with a MFI of 156, compared to a MFI of 10 for the OG1RF. In comparison, mAb 44 bound well to both the wild-type OG1RF and the  $\Delta$ gelE strain, with MFIs of 318 and 267, respectively, (Fig 2).  $\Delta$ atlA was used as a negative control to demonstrate that the antibodies utilized showed minimal cell binding in the absence of AtIA (MFI of single digits). These results, together with Western blot analysis, suggest that a GelE processed truncated form of AtIA is still associated with cell wall at levels similar to that of for the full length AtIA.

### GelE cleaves AtIA near the terminus of Domain I between Ala 173 and Leu 174

Our data thus far suggested that during GelE-mediated cleavage, a portion of AtIA remains on the surface of cells, and full-length and truncated versions of AtIA can be distinguished using domain specific mAbs. To determine the precise location of GelE-cleavage on recombinant AtIA an *in vitro* GelE cleavage assay was performed as shown in Fig 3B. N-terminal sequencing analysis on an isolated ~ 60 kDa AtIA band of recombinant AtIA (Fig 3B) cleaved by 10  $\mu$ g/mL purified GelE for 30 minutes at 37°C identified the GelE-cleavage site as occurring between Ala 173 and Leu 174. This site is within Domain I and 7 amino acids from the N terminus of Domain II (Fig 3A). Based on this information, we constructed and purified an N-terminally



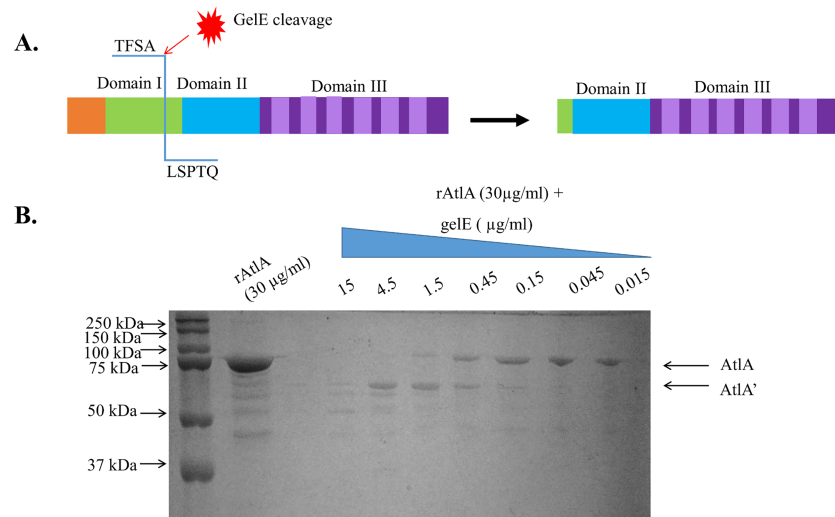

**Fig 3. GelE cleaves AtIA between Ala 173 and Leu 174 within Domain I.** (A) Truncated ~60 kDa band was N-terminally sequenced. The most prominent N-terminal sequence was identified as LSPTQ, suggesting that cleavage occurs between Ala 173 and Leu 174. (B) Cleavage of rAtIA by purified GelE. Sample lanes from right to left represent reaction mixtures containing 30 µg of rAtIA/ml with various amounts of purified GelE (0.015, 0.045, 0.15, 0.45, 1.5, 4.5, and 15 µg/ml), and rAtIA (30 µg/ml) alone. Molecular mass standards are indicated to the left in kilodaltons. Results presented in Fig 3B are representative of three independent experiments.

<https://doi.org/10.1371/journal.pone.0186706.g003>

truncated recombinant form of AtIA, rAtIA', for further functional analysis. The molecular weight of this cleavage product is 58.9kDa, consistent with the band detected in Western blot analysis of GelE producing strains.

### Presence of GelE does not significantly change peptidoglycan hydrolase activity of AtIA

One of the major functions of AtIA is peptidoglycan cleavage [22]. To determine the effect GelE cleavage has on the ability of AtIA to cleave peptidoglycan, we used a peptidoglycan hydrolase assay to compare activities of rAtIA and rAtIA' (Fig 4). As a control, peptidoglycan alone showed minimal peptidoglycan hydrolysis. The addition of either rAtIA or rAtIA' showed a significant ability to hydrolyze peptidoglycan compared to the peptidoglycan only control, while the two forms of the enzyme demonstrated no significant difference in the ability to hydrolyze peptidoglycan ( $p < 0.05$ ). This result demonstrated that GelE cleavage of AtIA does not significantly affect the peptidoglycan hydrolase activity of AtIA.

### GelE effects chain length partially through an AtIA interaction

It has been reported that both AtIA and GelE affect *E. faecalis* cell chain length [8,9,21]. We defined chain length as the number of cells per chain and categorized them as either a short, medium, long or extra-long chains as previously defined [41]. In three independent experiments 50 randomly chosen chains per strain were counted and the percentage of cells with less than or equal to 4 cells was determined (Table 1).

Consistent with results of Qin *et al.* [8], wild-type OG1RF cultured cells appeared in single or in pair forms, indicating separated cells ( $100\% \pm 0$  are  $< 4$  cells per chain) (Fig 5A), while OG1RF  $\Delta$ atIA demonstrated a chain phenotype in which the cells were not properly

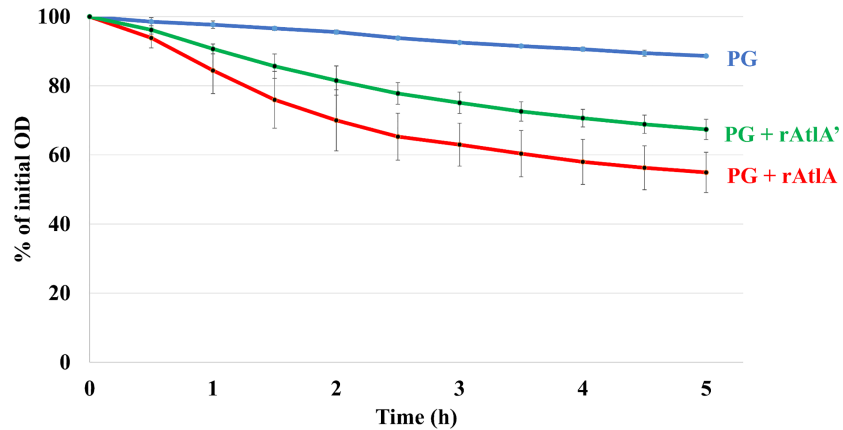

**Fig 4. GelE-dependent AtIA cleavage does not significantly affect AtIA peptidoglycan hydrolysis activity.** Equal molar concentrations (65 nM) of either recombinant full-length AtIA or AtIA' were added to purified peptidoglycan and the peptidoglycan hydrolysis rate was measured by examining the of the solution every 30 minutes over a 5-hour time period. As a control, the hydrolysis rate for peptidoglycan alone was measured. Results are averages of three independent experiments. Error bars represent one standard deviation of the mean. Statistical significant differences ( $P < 0.05$ ) in peptidoglycan hydrolysis were determined for PG + rAtIA and PG + rAtIA' relative to PG only, using Student's t test. No significant difference ( $P > 0.05$ ) was determined for PG + rAtIA relative to PG + rAtIA', using Student's t test.

<https://doi.org/10.1371/journal.pone.0186706.g004>

separated and thus contained more than two cells in a chain ( $40\% \pm 5.3$  are  $< 4$  cells per chain) (Fig 5B). Moreover, the absence of both AtIA and GelE ( $\Delta atIA\Delta gelE$ ) resulted in a long chain phenotype ( $28\% \pm 2$  are  $< 4$  cells per chain) (Fig 5C). Given that a larger percentage of chained cells were observed in  $\Delta atIA\Delta gelE$  than the  $\Delta atIA$  strain, suggests that GelE, in addition to AtIA modification, may affect chain length through other factors involved in septum cleavage.

We further examined whether the addition of recombinant AtIA could rescue the chaining phenotype observed in either the  $\Delta atIA$  or  $\Delta atIA\Delta gelE$  strains. Upon the addition of recombinant AtIA to a  $\Delta atIA$  strain, which expresses active GelE under our *in vitro* conditions, cells appeared as individual cells with short chains observed ( $98.7\% \pm 2.3$  are  $< 4$  cells per chain) (Fig 5D). The addition of full-length rAtIA to the  $\Delta atIA\Delta gelE$  strain displayed a medium chain phenotype ( $52.7\% \pm 3.9$  are  $< 4$  cells per chain) (Fig 5E) as opposed to the long chain observed in Fig 5C. However, the addition of recombinant AtIA' to the  $\Delta atIA\Delta gelE$  strain restored the culture to the individual cell phenotype ( $93.3\% \pm 3.1$  are  $< 4$  cells per chain) (Fig 5F) similar to the wild-type phenotype observed in Fig 5A. Since the addition of rAtIA', representing GelE-cleaved AtIA, restored the wild-type single or paired phenotype, this suggests that GelE-cleavage of AtIA promotes cell separation during division.

**Table 1. Percentage of cells with four or fewer cells per chain.**

|                          | No treatment  | + rAtIA         | + rAtIA'        |
|--------------------------|---------------|-----------------|-----------------|
| OG1RF                    | 100% $\pm$ 0  | N.D.            | N.D.            |
| $\Delta atIA$            | 40% $\pm$ 5.3 | 98.7% $\pm$ 2.3 | N.D.            |
| $\Delta atIA\Delta gelE$ | 28% $\pm$ 2   | 52.7% $\pm$ 3.8 | 93.3% $\pm$ 3.1 |

Averages of three independent experiments are shown in this table.  $\pm$  indicates one standard deviations from the mean. All groups were compared to their no treatment control.  $P > 0.05$  in all cases using Student's t test.

<https://doi.org/10.1371/journal.pone.0186706.t001>

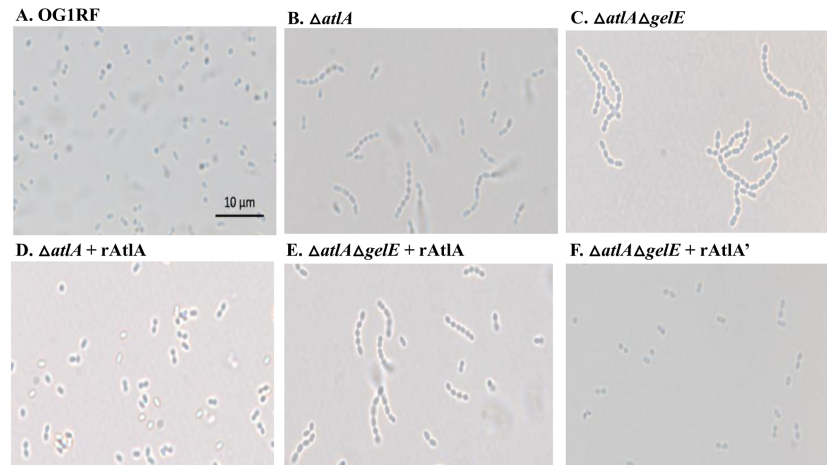

**Fig 5. Presence of AtIA and GelE affects cellular chain length.** OG1RF, OG1RFΔatlA, and OG1RFΔatlAΔgelE were harvested and imaged on a light microscope at 1000X magnification: (A) OG1RF (B) OG1RFΔatlA (C) OG1RFΔatlAΔgelE (D) OG1RFΔatlA + recombinant AtIA (E) OG1RFΔatlAΔgelE + recombinant AtIA (F) OG1RFΔatlAΔgelE + recombinant AtIA'. The scale bar in the lower right is 10 μm.

<https://doi.org/10.1371/journal.pone.0186706.g005>

### GelE-dependent AtIA cleavage impacts AtIA localization to the cell septum and cell pole

Given that the presence of GelE-cleaved AtIA promoted daughter cell separation as visualized by light microscopy, we investigated whether GelE-mediated cleavage might affect AtIA localization on daughter cells prior to separation. As observed by electron microscopy, AtIA protein on the cell surface of wild-type OG1RF, as monitored by anti-AtIA mAb 44 which can detect full length AtIA and AtIA', appeared to primarily localize to the cell septum region (Fig 6A). In a ΔgelE strain, using anti-AtIA mAb 44 to monitor AtIA localization, AtIA appeared dispersed across the surface of the cell rather than localizing to a specific area (Fig 6B). These observations are further confirmed by quantitative analysis of the site of AtIA localization on each bacterium. As shown in Fig 6C, majority of AtIA gold particles (73%) were localized in region 1, which is the equatorial region containing the cell division septum, comparing to 16% and 11% in regions 2 and 3, respectively. For the ΔgelE however, the distributions are 36%, 34%, and 30% for region 1, 2, and 3, respectively. Based on these results, we hypothesize that cell pole localization was dependent on the presence of GelE.

### Discussion

In *E. faecalis*, AtIA is the major peptidoglycan hydrolase. The ability to cleave peptidoglycan makes AtIA pivotal in separating dividing cells [8,9]. As such, AtIA requires strict modulation to regulate its function in cell division. Recent evidence suggests that multiple mechanisms control AtIA activity, including glycosylation [13]. The results presented here provide strong evidence that post-translational modification of AtIA by GelE directly affects the function of AtIA during cell division.

Under zymogram analysis, Eckert *et al.* demonstrated that AtIA displayed two protein bands that were present in the wild-type strain, but lacking in the OG1RFΔatlA strain: one at 72 kDa (the approximate molecular weight of AtIA) and the other at 62 kDa [22]. Thomas *et al.* examined the impact proteases induced by the Fsr quorum sensing system of *E. faecalis* had on the autolytic profiles of wild type OG1RF, OG1RFΔgelE, OG1RFΔgelEΔsprE, and OG1RFΔsprE cells. In surface autolysin profiles, a processed AtIA band of approximately

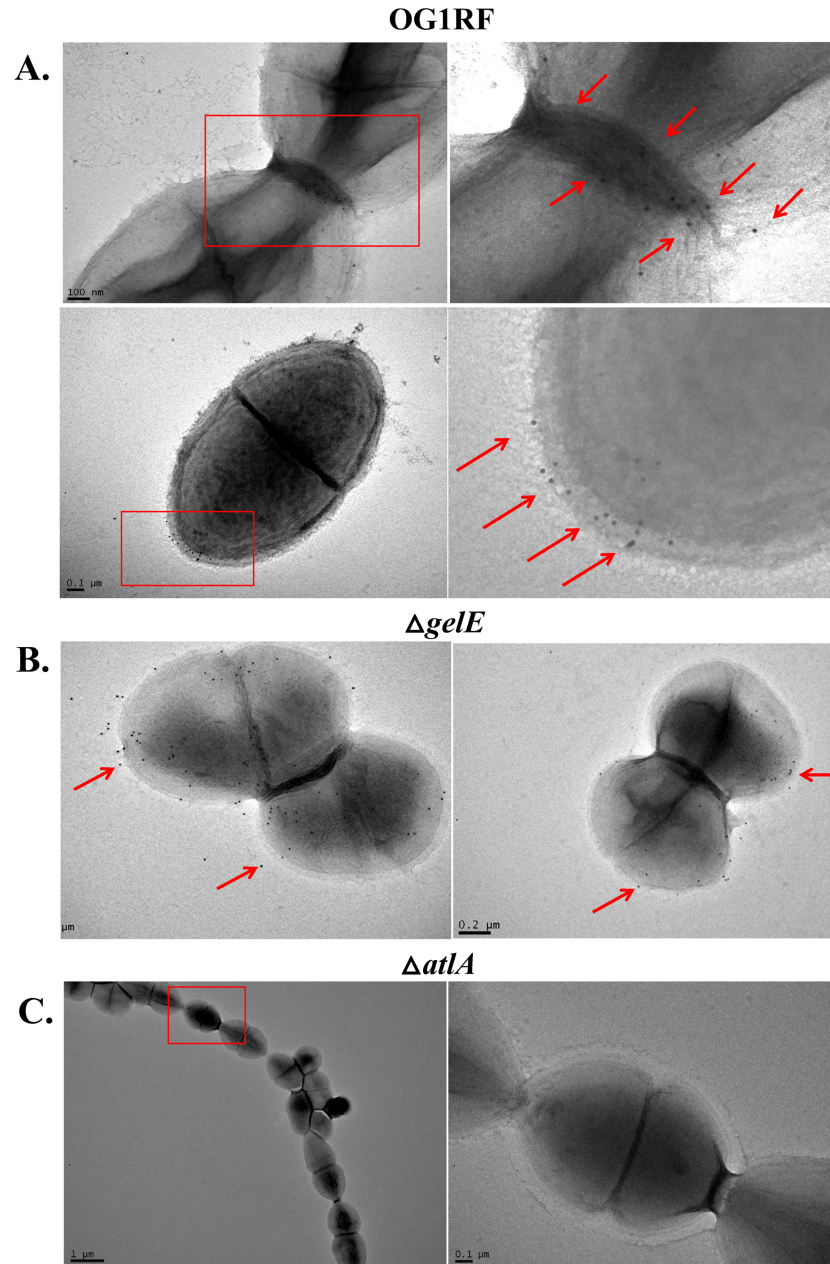

**Fig 6. Impact of GelE activity on AtIA subcellular localization.** OG1RF and  $\Delta gelE$  were cultured overnight in BHI and placed on nickel-coated carbon grid. Anti-AtIA mAb 44 was used to label AtIA on the surface of cells. Samples were then labeled with gold-conjugated anti-mouse IgG and then imaged with a JEOL JEM-1400 electron microscope. (A) OG1RF (B)  $\Delta gelE$ . (C) OG1RF and  $\Delta gelE$  *E. faecalis* were equally divided into three regions by the distance to the center septum. For each strain, fifty cells at the late stages of cell division were selected for analysis.

<https://doi.org/10.1371/journal.pone.0186706.g006>

62kDa was observed only in cells producing GelE, whereas those lacking GelE (OG1RF $\Delta gelE$ , OG1RF $\Delta gelE\Delta sprE$ ) expressed AtIA of approximately 72kDa [20]. Consistent with these results, our analysis of AtIA expression in different *E. faecalis* strains by Western blot showed that strains that expressed GelE (OG1RF and OG1RF $\nabla sprE$ ) displayed a major band consistent with the 62 kDa band observed while those strains that were incapable of producing GelE

(OG1RF $\Delta$ gelE and OG1RF $\Delta$ gelE $\Delta$ sprE) displayed a major band at approximately 72 kDa, the size of full length AtIA (Fig 1B). Together these results suggested that the presence of GelE is necessary for the processing of AtIA to the 62 kDa fragment. After further analysis, the GelE-cleavage site on AtIA was identified within Domain I. We showed that this cleavage site occurs between Ala 173 and Leu 174, near the start of the pre-defined Domain II (Fig 3). AtIA lacking this N-terminal region would have a molecular weight of 58.9 kDa, consistent with the approximate 62 kDa observed.

While work by Thomas *et al.* suggests a role for SprE-mediated processing of AtIA in regulating autolysis activity, [20] we were unable to find evidence supporting a major role of SprE processing of AtIA in mediating cell division, as GelE-processed AtIA alone could alleviate the chaining phenotype when incubated with our  $\Delta$ atIA $\Delta$ gelE strain *in vitro*. In addition, analysis of different *E. faecalis* strains lacking SprE expression (OG1RF $\nabla$ sprE and OG1RF $\Delta$ gelE $\Delta$ sprE) had no detectable impact on AtIA bands detected by Western Blot analysis, producing results similar to that of OG1RF and OG1RF $\Delta$ gelE respectively. (Fig 1B) Taken together, these findings did not demonstrate an appreciable role for a SprE AtIA interaction in the regulation of cell division.

Once the GelE cleavage site on AtIA was identified, we sought to determine its impact on AtIA activity. Eckert *et al.* examined the enzymatic activity of different domain truncations of AtIA [22]. Truncation of Domain I did not significantly alter the enzymatic activity. In contrast, truncation of Domain III from Domain I and II led to a significant decrease in enzymatic activity, suggesting that Domain III is required for enzymatic activity [22]. Domain III contains six LysM molecules that confer AtIA the ability to bind to peptidoglycan. Based on these findings, Eckert *et al.* proposed that Domain III is required to bring Domain II within the vicinity of its peptidoglycan substrate [22]. Consistent with our work, cleavage of the N-terminal domain by GelE did not significantly impact the ability of AtIA to hydrolyze peptidoglycan (Fig 4).

OG1RF $\Delta$ atIA grow as long chains linked together at their cell septa, unable to properly separate [8,9]. Similarly, OG1RF $\Delta$ gelE cells also display a chaining phenotype, suggesting that GelE is required for cell separation. Upon the complementation of a OG1RF $\Delta$ gelE strain with gelE, the cells appeared either in pairs or as single cells, further suggesting that the presence of GelE impacts cell division [21]. To determine the impact of GelE on chain length, Arias and Murray evaluated different *E. faecalis* clinical isolates for the expression of GelE and degree of chaining. These findings demonstrated that the absence of GelE did not necessarily correlate with a long chain phenotype [41]. However, if GelE must act through AtIA to mediate cell separation as our results suggest, any disruption of AtIA, regardless of the GelE expression, would present as a long chain phenotype and explain the lack of correlation seen between GelE expression and chaining. Alternatively, other mechanisms may be involved in *E. faecalis* cell separation independent of GelE, as suggested by Salamaga *et al.* [13].

During early growth stages long chains of cells are produced [44]. In *Streptococcus pneumoniae*, a streptococcus that has both short and long chain phenotypes similar to *E. faecalis*, the long chain phenotype is associated with an advantage in human epithelial cell adherence due to an increase in the number of adhesive events per particle [11]. Moreover, it was hypothesized that a short chain length in *S. pneumoniae* allows the bacterium to evade host immune defense cells, such as phagocytes, promoting invasive disease [45]. Based on these findings, we speculate that human cell adherence would be most important at early stages of growth, potentially prior to Fsr signaling, when GelE cleavage of AtIA has not yet occurred and long cell chains are observed. As GelE reaches maximum activity levels at later growth stages, after colonization is established, AtIA would be cleaved and short cell chains would result. These short chains could potentially aid in bacterial dissemination or help *E. faecalis* evade host immune

defense. GelE has previously been shown to be associated with an increase in bacterial burden at dissemination sites [46]. Thus, GelE could aid in bacterial cell dissemination by cleaving AtlA at a later growth stage, resulting in short chains. The short chained *E. faecalis* cells have been shown to have decreased phagocytosis in a zebrafish infection model [13], further suggesting that the GelE processing of AtlA may impact *E. faecalis* virulence.

Using our anti-AtlA mAb to track both GelE-cleaved and full-length AtlA, localization of AtlA in wild-type OG1RF and OG1RF $\Delta$ gelE cells was monitored via electron microscopy. Wild-type OG1RF cells labeled with anti-AtlA mAb 44 showed localization of AtlA to the cell septum (Fig 6A) while OG1RF $\Delta$ gelE cells labeled with anti-AtlA mAb 44 showed random localization of AtlA across the cell surface (Fig 6B). These observations indicate that the presence of GelE is required for AtlA to accumulate at the cell septum.

While our evidence independently demonstrates that GelE-mediated cleavage of AtlA is sufficient to encourage cell separation and cleaved AtlA localization to the cell septum, our efforts to date have not yet provided a complete understanding of the mechanism which mediates these events. In staphylococci, the major autolysin, AtlA, was found to localize to the cell septum due to an interaction with one of the major peptidoglycan constituents, lipoteichoic acid (LTA) [47], while wall teichoic acid (WTA), which is lower in abundance at the staphylococcal cell septum, is thought to prevent AtlA binding [48]. Based on these results, future work will explore the role of teichoic acid on the localization of cleaved AtlA. Continued study of will provide a deeper understanding of cell separation during the final stage of cell division and the potential importance of coordinating cell separation and cellular density through Fsr mediated GelE expression.

## Acknowledgments

Support for this work was provided in part by the Dunn Foundation to BRH and NIH grant R01 AI047923-14 from NIAID to BEM. We thank the Protein Chemistry laboratory at Texas A&M for assistance with N-terminal sequencing.

## Author Contributions

**Conceptualization:** Emily K. Stinemetz, Peng Gao, Kenneth L. Pinkston, Barrett R. Harvey.

**Data curation:** Emily K. Stinemetz, Peng Gao, Kenneth L. Pinkston, Barrett R. Harvey.

**Formal analysis:** Barrett R. Harvey.

**Funding acquisition:** Barbara E. Murray, Barrett R. Harvey.

**Investigation:** Emily K. Stinemetz, Peng Gao, Kenneth L. Pinkston, Maria Camila Montealegre.

**Methodology:** Emily K. Stinemetz, Peng Gao, Kenneth L. Pinkston, Maria Camila Montealegre.

**Project administration:** Barrett R. Harvey.

**Supervision:** Peng Gao, Kenneth L. Pinkston, Barbara E. Murray, Barrett R. Harvey.

**Validation:** Peng Gao, Kenneth L. Pinkston.

**Writing – original draft:** Emily K. Stinemetz, Peng Gao, Kenneth L. Pinkston, Barrett R. Harvey.

**Writing – review & editing:** Emily K. Stinemetz, Peng Gao, Kenneth L. Pinkston, Barbara E. Murray, Barrett R. Harvey.

## References

1. Murray BE (1990) The life and times of the Enterococcus. *Clin Microbiol Rev* 3: 46–65. PMID: [2404568](#)
2. Sievert DM, Ricks P, Edwards JR, Schneider A, Patel J, et al. (2013) Antimicrobial-resistant pathogens associated with healthcare-associated infections: summary of data reported to the National Healthcare Safety Network at the Centers for Disease Control and Prevention, 2009–2010. *Infect Control Hosp Epidemiol* 34: 1–14. <https://doi.org/10.1086/668770> PMID: [23221186](#)
3. Donlan RM, Costerton JW (2002) Biofilms: survival mechanisms of clinically relevant microorganisms. *Clin Microbiol Rev* 15: 167–193. <https://doi.org/10.1128/CMR.15.2.167-193.2002> PMID: [11932229](#)
4. Joyanes P, Pascual A, Martinez-Martinez L, Hevia A, Perea EJ (1999) In vitro adherence of *Enterococcus faecalis* and *Enterococcus faecium* to plastic biomaterials. *Clin Microbiol Infect* 5: 382–386. PMID: [11856286](#)
5. Joyanes P, Pascual A, Martinez-Martinez L, Hevia A, Perea EJ (2000) In vitro adherence of *Enterococcus faecalis* and *Enterococcus faecium* to urinary catheters. *Eur J Clin Microbiol Infect Dis* 19: 124–127. PMID: [10746500](#)
6. Arias CA, Murray BE (2012) The rise of the Enterococcus: beyond vancomycin resistance. *Nat Rev Microbiol* 10: 266–278. <https://doi.org/10.1038/nrmicro2761> PMID: [22421879](#)
7. Flemming HC, Wingender J (2010) The biofilm matrix. *Nat Rev Microbiol* 8: 623–633. <https://doi.org/10.1038/nrmicro2415> PMID: [20676145](#)
8. Qin X, Singh KV, Xu Y, Weinstock GM, Murray BE (1998) Effect of disruption of a gene encoding an autolysin of *Enterococcus faecalis* OG1RF. *Antimicrob Agents Chemother* 42: 2883–2888. PMID: [9797220](#)
9. Mesnage S, Chau F, Dubost L, Arthur M (2008) Role of N-acetylglucosaminidase and N-acetylmuramidase activities in *Enterococcus faecalis* peptidoglycan metabolism. *J Biol Chem* 283: 19845–19853. <https://doi.org/10.1074/jbc.M802323200> PMID: [18490448](#)
10. Young KD (2006) The selective value of bacterial shape. *Microbiol Mol Biol Rev* 70: 660–703. <https://doi.org/10.1128/MMBR.00001-06> PMID: [16959965](#)
11. Rodriguez JL, Dalia AB, Weiser JN (2012) Increased chain length promotes pneumococcal adherence and colonization. *Infect Immun* 80: 3454–3459. <https://doi.org/10.1128/IAI.00587-12> PMID: [22825449](#)
12. Mohamed JA, Huang W, Nallapareddy SR, Teng F, Murray BE (2004) Influence of origin of isolates, especially endocarditis isolates, and various genes on biofilm formation by *Enterococcus faecalis*. *Infect Immun* 72: 3658–3663. <https://doi.org/10.1128/IAI.72.6.3658-3663.2004> PMID: [15155680](#)
13. Salamaga B, Prajsnar TK, Jareno-Martinez A, Willemse J, Bewley MA, et al. (2017) Bacterial size matters: Multiple mechanisms controlling septum cleavage and diplococcus formation are critical for the virulence of the opportunistic pathogen *Enterococcus faecalis*. *PLoS Pathog* 13: e1006526. <https://doi.org/10.1371/journal.ppat.1006526> PMID: [28742152](#)
14. Engelbert M, Mylonakis E, Ausubel FM, Calderwood SB, Gilmore MS (2004) Contribution of gelatinase, serine protease, and *fsr* to the pathogenesis of *Enterococcus faecalis* endophthalmitis. *Infect Immun* 72: 3628–3633. <https://doi.org/10.1128/IAI.72.6.3628-3633.2004> PMID: [15155673](#)
15. Nakayama J, Cao Y, Horii T, Sakuda S, Akkermans AD, et al. (2001) Gelatinase biosynthesis-activating pheromone: a peptide lactone that mediates a quorum sensing in *Enterococcus faecalis*. *Mol Microbiol* 41: 145–154. PMID: [11454207](#)
16. Teixeira N, Varahan S, Gorman MJ, Palmer KL, Zaidman-Remy A, et al. (2013) *Drosophila* host model reveals new enterococcus faecalis quorum-sensing associated virulence factors. *PLoS One* 8: e64740. <https://doi.org/10.1371/journal.pone.0064740> PMID: [23734216](#)
17. Qin X, Singh KV, Weinstock GM, Murray BE (2000) Effects of *Enterococcus faecalis* *fsr* genes on production of gelatinase and a serine protease and virulence. *Infect Immun* 68: 2579–2586. PMID: [10768947](#)
18. Qin X, Singh KV, Weinstock GM, Murray BE (2001) Characterization of *fsr*, a regulator controlling expression of gelatinase and serine protease in *Enterococcus faecalis* OG1RF. *J Bacteriol* 183: 3372–3382. <https://doi.org/10.1128/JB.183.11.3372-3382.2001> PMID: [11344145](#)
19. Thomas VC, Thurlow LR, Boyle D, Hancock LE (2008) Regulation of autolysis-dependent extracellular DNA release by *Enterococcus faecalis* extracellular proteases influences biofilm development. *J Bacteriol* 190: 5690–5698. <https://doi.org/10.1128/JB.00314-08> PMID: [18556793](#)
20. Thomas VC, Hiromasa Y, Harms N, Thurlow L, Tornich J, et al. (2009) A fratricidal mechanism is responsible for eDNA release and contributes to biofilm development of *Enterococcus faecalis*. *Mol Microbiol* 72: 1022–1036. PMID: [19400795](#)
21. Waters CM, Antipporta MH, Murray BE, Dunny GM (2003) Role of the *Enterococcus faecalis* GelE protease in determination of cellular chain length, supernatant pheromone levels, and degradation of fibrin

- and misfolded surface proteins. *J Bacteriol* 185: 3613–3623. <https://doi.org/10.1128/JB.185.12.3613-3623.2003> PMID: 12775699
22. Palma L, Munoz D, Berry C, Murillo J, Caballero P (2014) Draft genome sequences of two *Bacillus thuringiensis* strains and characterization of a putative 41.9-kDa insecticidal toxin. *Toxins (Basel)* 6: 1490–1504.
  23. Mesnage S, Dellarole M, Baxter NJ, Rouget JB, Dimitrov JD, et al. (2014) Molecular basis for bacterial peptidoglycan recognition by LysM domains. *Nat Commun* 5: 4269. <https://doi.org/10.1038/ncomms5269> PMID: 24978025
  24. Dunny GM, Brown BL, Clewell DB (1978) Induced cell aggregation and mating in *Streptococcus faecalis*: evidence for a bacterial sex pheromone. *Proc Natl Acad Sci U S A* 75: 3479–3483. PMID: 98769
  25. Sifri CD, Mylonakis E, Singh KV, Qin X, Garsin DA, et al. (2002) Virulence effect of *Enterococcus faecalis* protease genes and the quorum-sensing locus *fsr* in *Caenorhabditis elegans* and mice. *Infect Immun* 70: 5647–5650. <https://doi.org/10.1128/IAI.70.10.5647-5650.2002> PMID: 12228293
  26. Jacob AE, Hobbs SJ (1974) Conjugal transfer of plasmid-borne multiple antibiotic resistance in *Streptococcus faecalis* var. *zymogenes*. *J Bacteriol* 117: 360–372. PMID: 4204433
  27. Pinkston KL, Gao P, Diaz-Garcia D, Sillanpaa J, Nallapareddy SR, et al. (2011) The *Fsr* quorum-sensing system of *Enterococcus faecalis* modulates surface display of the collagen-binding MSCRAMM Ace through regulation of *gelE*. *J Bacteriol* 193: 4317–4325. <https://doi.org/10.1128/JB.05026-11> PMID: 21705589
  28. Kristich CJ, Chandler JR, Dunny GM (2007) Development of a host-genotype-independent counterselectable marker and a high-frequency conjugative delivery system and their use in genetic analysis of *Enterococcus faecalis*. *Plasmid* 57: 131–144. <https://doi.org/10.1016/j.plasmid.2006.08.003> PMID: 16996131
  29. Ho SN, Hunt HD, Horton RM, Pullen JK, Pease LR (1989) Site-directed mutagenesis by overlap extension using the polymerase chain reaction. *Gene* 77: 51–59. PMID: 2744487
  30. Panesso D, Montealegre MC, Rincon S, Mojica MF, Rice LB, et al. (2011) The *hylEfm* gene in *pHylEfm* of *Enterococcus faecium* is not required in pathogenesis of murine peritonitis. *BMC Microbiol* 11: 20. <https://doi.org/10.1186/1471-2180-11-20> PMID: 21266081
  31. Palma L, Munoz D, Berry C, Murillo J, Caballero P (2014) *Bacillus thuringiensis* toxins: an overview of their biocidal activity. *Toxins (Basel)* 6: 3296–3325.
  32. Gao P, Pinkston KL, Nallapareddy SR, van Hoof A, Murray BE, et al. (2010) *Enterococcus faecalis* *njB* is required for pilin gene expression and biofilm formation. *J Bacteriol* 192: 5489–5498. <https://doi.org/10.1128/JB.00725-10> PMID: 20729365
  33. Kohler G, Milstein C (1975) Continuous cultures of fused cells secreting antibody of predefined specificity. *Nature* 256: 495–497. PMID: 1172191
  34. Nallapareddy SR, Singh KV, Sillanpaa J, Garsin DA, Hook M, et al. (2006) Endocarditis and biofilm-associated pili of *Enterococcus faecalis*. *J Clin Invest* 116: 2799–2807. <https://doi.org/10.1172/JCI29021> PMID: 17016560
  35. Prieto CI, Rodriguez ME, Bosch A, Chirido FG, Yantorno OM (2003) Whole-bacterial cell enzyme-linked immunosorbent assay for cell-bound *Moraxella bovis* pili. *Vet Microbiol* 91: 157–168. PMID: 12458165
  36. Canziani GA, Klakamp S, Myszka DG (2004) Kinetic screening of antibodies from crude hybridoma samples using Biacore. *Anal Biochem* 325: 301–307. PMID: 14751265
  37. Cabrera R, Rocha J, Flores V, Vazquez-Moreno L, Guarneros G, et al. (2014) Regulation of sporulation initiation by *NprR* and its signaling peptide *NprRB*: molecular recognition and conformational changes. *Appl Microbiol Biotechnol* 98: 9399–9412. <https://doi.org/10.1007/s00253-014-6094-8> PMID: 25256619
  38. Makinen PL, Clewell DB, An F, Makinen KK (1989) Purification and substrate specificity of a strongly hydrophobic extracellular metalloendopeptidase ("gelatinase") from *Streptococcus faecalis* (strain OG1-10). *J Biol Chem* 264: 3325–3334. PMID: 2536744
  39. Hancock LE, Perego M (2004) The *Enterococcus faecalis* *fsr* two-component system controls biofilm development through production of gelatinase. *J Bacteriol* 186: 5629–5639. <https://doi.org/10.1128/JB.186.17.5629-5639.2004> PMID: 15317767
  40. Singh KV, Nallapareddy SR, Nannini EC, Murray BE (2005) *Fsr*-independent production of protease(s) may explain the lack of attenuation of an *Enterococcus faecalis* *fsr* mutant versus a *gelE*-*sprE* mutant in induction of endocarditis. *Infect Immun* 73: 4888–4894. <https://doi.org/10.1128/IAI.73.8.4888-4894.2005> PMID: 16041002
  41. Arias CA, Cortes L, Murray BE (2007) Chaining in enterococci revisited: correlation between chain length and gelatinase phenotype, and *gelE* and *fsrB* genes among clinical isolates of *Enterococcus faecalis*. *J Med Microbiol* 56: 286–288. <https://doi.org/10.1099/jmm.0.46877-0> PMID: 17244816



42. Chang C, Huang IH, Hendrickx AP, Ton-That H (2013) Visualization of Gram-positive bacterial pili. *Methods Mol Biol* 966: 77–95. [https://doi.org/10.1007/978-1-62703-245-2\\_5](https://doi.org/10.1007/978-1-62703-245-2_5) PMID: 23299729
43. Kline KA, Kau AL, Chen SL, Lim A, Pinkner JS, et al. (2009) Mechanism for sortase localization and the role of sortase localization in efficient pilus assembly in *Enterococcus faecalis*. *J Bacteriol* 191: 3237–3247. <https://doi.org/10.1128/JB.01837-08> PMID: 19286802
44. Lominski I, Cameron J, Wyllie G (1958) Chaining and unchaining *Streptococcus faecalis*; a hypothesis of the mechanism of bacterial cell separation. *Nature* 181: 1477.
45. Weiser JN (2010) The pneumococcus: why a commensal misbehaves. *J Mol Med (Berl)* 88: 97–102.
46. Thurlow LR, Thomas VC, Narayanan S, Olson S, Fleming SD, et al. (2010) Gelatinase contributes to the pathogenesis of endocarditis caused by *Enterococcus faecalis*. *Infect Immun* 78: 4936–4943. <https://doi.org/10.1128/IAI.01118-09> PMID: 20713628
47. Zoll S, Schlag M, Shkumatov AV, Rautenberg M, Svergun DI, et al. (2012) Ligand-binding properties and conformational dynamics of autolysin repeat domains in staphylococcal cell wall recognition. *J Bacteriol* 194: 3789–3802. <https://doi.org/10.1128/JB.00331-12> PMID: 22609916
48. Schlag M, Biswas R, Krismer B, Kohler T, Zoll S, et al. (2010) Role of staphylococcal wall teichoic acid in targeting the major autolysin Atl. *Mol Microbiol* 75: 864–873. <https://doi.org/10.1111/j.1365-2958.2009.07007.x> PMID: 20105277
